# Supplementary material for: The impact of oxygen evolution and cation migration on the cycling stability of a Li-rich Li[Li0.2Mn0.6Ni0.1Co0.1]O2 positive electrode
Source: Royal Society of Chemistry journal article supplement (doi:10.1039/d0ta05556e), 2020-01-01
Supplement: d0ta05556e1.pdf [file d0ta05556e1.pdf]

## The Impact of Oxygen Evolution And Cations Migration on Cycling

### Stability of Li-rich $\text{Li}[\text{Li}_{0.2}\text{Mn}_{0.6}\text{Ni}_{0.1}\text{Co}_{0.1}]\text{O}_2$ positive electrode

Katarzyna Redel <sup>a\*</sup>, Andrzej Kulka <sup>a,b\*</sup>, Katarzyna Walczak <sup>a</sup>, Anna Plewa <sup>a,c</sup>, Camelia N. Borca <sup>b</sup>, Janina Molenda <sup>a\*</sup>

<sup>a</sup> AGH University of Science and Technology, Faculty of Energy and Fuels, Al. Mickiewicza 30, 30-059 Krakow, Poland

<sup>b</sup> Paul Scherrer Institute, Forschungsstrasse 111, 5232 Villigen PSI, Switzerland

<sup>c</sup> National University of Singapore, Department of Mechanical Engineering, 21 Lower Kent Ridge Rd, 117575, Singapore

\*Corresponding authors. E-mail addresses:

[redel@agh.edu.pl](mailto:redel@agh.edu.pl) (K. Redel),

[akulka@agh.edu.pl](mailto:akulka@agh.edu.pl) (A. Kulka),

[molenda@agh.edu.pl](mailto:molenda@agh.edu.pl) (J. Molenda)

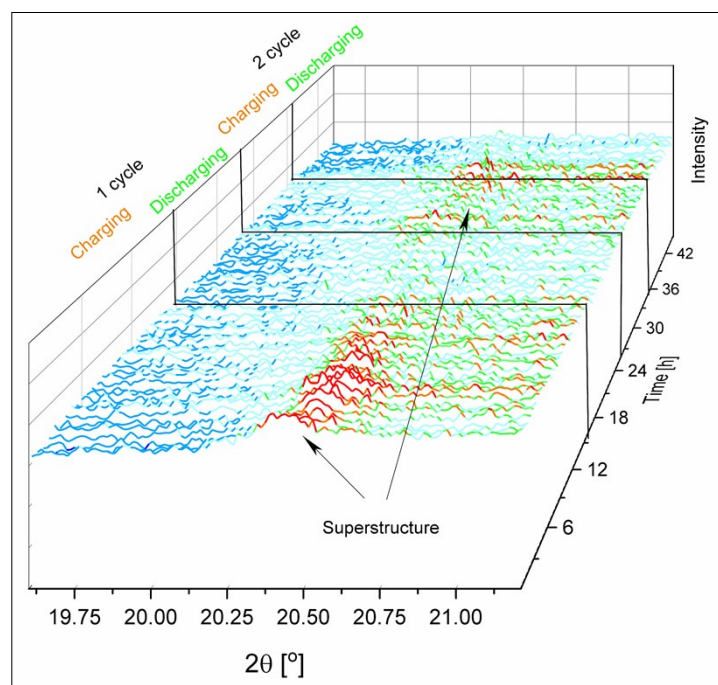

**Fig. S1.** In-situ XRD patterns with superstructure area of the  $\text{Li}[\text{Li}_{0.2}\text{Mn}_{0.6}\text{Ni}_{0.1}\text{Co}_{0.1}]\text{O}_2$  with corresponding 1<sup>st</sup> and 2<sup>nd</sup> charge/discharge cycles versus time.

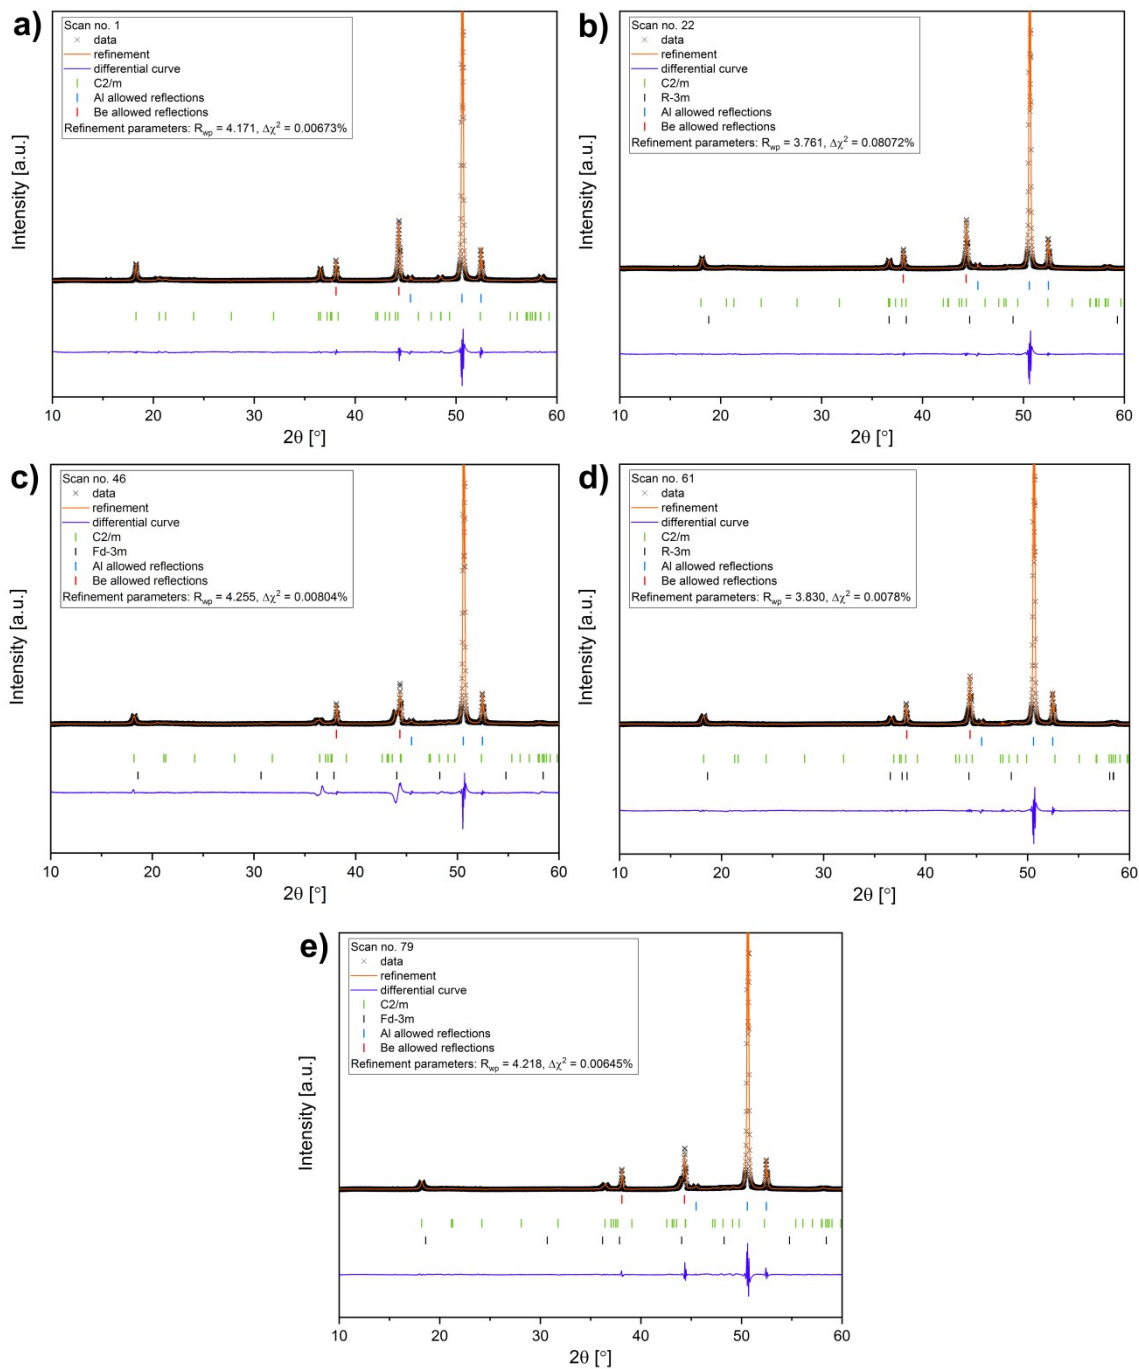

**Fig. S2.** Selected operando XRD patterns with Rietveld refinement obtained during 1<sup>st</sup> and 2<sup>nd</sup> charge/discharge processes of the Li/Li<sup>+</sup>/Li[Li<sub>0.2</sub>Mn<sub>0.6</sub>Ni<sub>0.1</sub>Co<sub>0.1</sub>]O<sub>2</sub> cell.
